# Supplementary material
Source: publisher figshare collection journal article supplement (https://acs.figshare.com/ndownloader/files/5801409)
Supplement: Supplementary file 1 [file 5801409]

#### Terms & Conditions

Electronic Supporting Information files are available without a subscription to ACS Web Editions. The American Chemical Society holds a copyright ownership interest in any copyrightable Supporting Information. Files available from the ACS website may be downloaded for personal use only. Users are not otherwise permitted to reproduce, republish, redistribute, or sell any Supporting Information from the ACS website, either in whole or in part, in either machine-readable form or any other form without permission from the American Chemical Society. For permission to reproduce, republish and redistribute this material, requesters must process their own requests via the RightsLink permission system. Information about how to use the RightsLink permission system can be found at <http://pubs.acs.org/page/copyright/permissions.html>

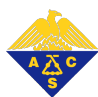

ACS Publications

MOST TRUSTED. MOST CITED. MOST READ.

Copyright © 1998 American Chemical Society

**2-(4-Methoxyphenyl)-3-(trimethylsilyl)-1-propene (3a).**<sup>5c</sup> Compound **3a+1a** (ratio 97/3) was obtained in 42% yield at 60 °C. The eluent was isohexane/diethyl ether 19:1 and the products were further purified by bulb-to-bulb distillation (~100 °C at 10 mm Hg).

**2-(4-*t*-Butylphenyl)-3-(trimethylsilyl)-1-propene (3b).** Compound **3b+1b** (ratio 94/6) was obtained in 47% yield at 60 °C. An alumina column was used for chromatography. The eluent was isohexane and the products were further purified by bulb-to-bulb distillation (~110 °C at 10 mm Hg). <sup>1</sup>H NMR (270 MHz, CDCl<sub>3</sub>) δ 7.32 (app d, *J* = 1.7 Hz, 4 H), 5.13 (s, 1 H), 4.82 (m, 1 H), 2.00 (d, *J* = 0.7 Hz, 2 H), 1.31 (s, 9 H), -0.09 (s, 9 H); <sup>13</sup>C NMR (67.8 MHz, CDCl<sub>3</sub>) δ 150.1, 146.2, 139.7, 125.9, 124.9, 109.3, 34.4, 31.3, 25.9, -1.4; MS *m/z* (relative intensity 70 eV) 246 (M<sup>+</sup>, 12), 189 (61), 73 (100). Anal. calcd for C<sub>16</sub>H<sub>26</sub>Si: C, 78.0; H, 10.6. Found: C, 77.9; H, 10.4.

**2-(2,3,5-Trimethylphenyl)-3-(trimethylsilyl)-1-propene (3c).** Compound **3c** was obtained in 69% yield after 10 days at 60 °C and in 60% after 16 h at 80 °C. The eluent was isohexane and the products were further purified by bulb-to-bulb distillation (~100 °C at 10 mm Hg). <sup>1</sup>H NMR (270 MHz, CDCl<sub>3</sub>) δ 6.87 (s, 1 H), 6.78 (s, 1 H), 4.98 (m, 1 H), 4.73 (d, *J* = 2.3 Hz, 1H), 2.26 (s, 3 H), 2.23 (s, 3 H), 2.19 (s, 3 H), 1.88 (d, *J* = 1.0 Hz, 2H), -0.08 (s, 9 H); <sup>13</sup>C NMR (67.8 MHz, CDCl<sub>3</sub>) δ 148.5, 144.7, 136.7, 134.1, 129.7, 129.0, 126.8, 111.9, 29.1, 20.8, 20.4, 16.3, -1.7; MS *m/z* (relative intensity 70 eV) 232 (M<sup>+</sup>, 47), 217 (60), 73 (100). Anal. calcd for C<sub>15</sub>H<sub>24</sub>Si: C, 77.5; H, 10.4. Found: C, 77.4; H, 10.0.

**2-Phenyl-3-(trimethylsilyl)-1-propene (3d).**<sup>5c</sup> Compound **3d+1d** (ratio 95/5) was obtained in 67% yield at 60 °C. The eluent was isohexane and the products were further purified by bulb-to-bulb distillation (~105 °C at 10 mm Hg).

**2-(1-Naphthyl)-3-(trimethylsilyl)-1-propene (3e).**<sup>5c</sup> Compound **3e+1e** (ratio 98/2) was obtained in 77% yield at 60 °C. The eluent was isohexane. No bulb-to-bulb distillation was needed.

**2-(4-Acetylphenyl)-3-(trimethylsilyl)-1-propene (3g).** Compound **3g+1g** (ratio 94/6) was obtained in 31% yield at 80 °C. The eluent was isohexane/diethyl ether 9:1 and the products were further purified by bulb-to-bulb distillation (~135 °C at 6 mm Hg). <sup>1</sup>H NMR (270 MHz, CDCl<sub>3</sub>) δ 7.89 (m, 2 H), 7.47 (m, 2 H), 5.21 (d, *J* = 1.3 Hz, 1 H), 4.96 (dd, *J* = 1.0 Hz, 1.3 Hz, 1 H), 2.81 (s, 3 H), 2.03 (d, *J* = 1.0 Hz, 2 H), -0.13 (s, 9 H); <sup>13</sup>C NMR (67.8 MHz, CDCl<sub>3</sub>) δ 197.6, 147.5, 145.7, 135.8, 128.3, 126.4, 112.1, 26.5, 25.9, -1.5; MS *m/z* (relative intensity 70 eV) 232 (*M*<sup>+</sup>, 65), 217 (8), 73 (100). Anal. calcd for C<sub>14</sub>H<sub>20</sub>OSi: C, 72.4; H, 8.7. Found: C, 72.7; H, 8.6.

**2-(4-Cyanophenyl)-3-(trimethylsilyl)-1-propene (3h).** Compound **3h** was obtained in 59% yield at 80 °C. The eluent was isohexane/diethyl ether 19:1 and the products were further purified by bulb-to-bulb distillation (~115 °C at 10 mm Hg). <sup>1</sup>H NMR (270 MHz, CDCl<sub>3</sub>) δ 7.58 (m, 2 H), 7.47 (m, 2 H), 5.20 (d, *J* = 1.0 Hz, 1 H), 4.99 (dd, *J* = 1.0 Hz, 1.0 Hz, 1 H), 2.00 (d, *J* = 1.0 Hz, 2 H), -0.11 (s, 9 H); <sup>13</sup>C NMR (67.8 MHz, CDCl<sub>3</sub>) δ 147.3, 145.1, 131.9, 126.8, 118.9, 112.9, 110.7, 25.4, -1.5; MS *m/z* (relative intensity 70 eV) 215 (*M*<sup>+</sup>, 32), 200 (7), 73 (100). Anal. calcd for C<sub>13</sub>H<sub>17</sub>NSi: C, 72.5; H, 8.0; N, 6.5. Found: C, 72.7; H, 7.9; N, 6.7.
